Typeset, Printed and Published by  
The Company of Biologists Limited  
Department of Zoology, University of Cambridge, Downing Street,  
Cambridge CB2 3EJ

© The Company of Biologists Limited 1985

## Errata

Intestinal cytodifferentiation *in vitro* of chick stomach endoderm induced by the duodenal mesenchyme

By ATSUKO ISHIZUYA-OKA AND TAKEO MIZUNO

*J. Embryol. exp. Morph.* **82**, 163–176

In the legend for Fig. 13 the fourth line should read 'i, p, g, see Fig. 1; \*\*, see Table 2; □, cells possessing striated border; ▨, cells possessing sucrase.'

In the article by A. TAMARIN, A. CRAWLEY, J. LEE AND C. TICKLE

*J. Embryol. exp. Morph.* **84**, 105–123

The title should read:

Analysis of upper beak defects in chicken embryos following treatment with retinoic acid
